# Supplementary material
Source: publisher site journal article supplement (doi:10.18632/aging.206372)
Supplement: Supplementary file 2 [file aging-v18i1-206372-supplementary-material-SD1.pdf]

**SUPPLEMENTARY FIGURE**

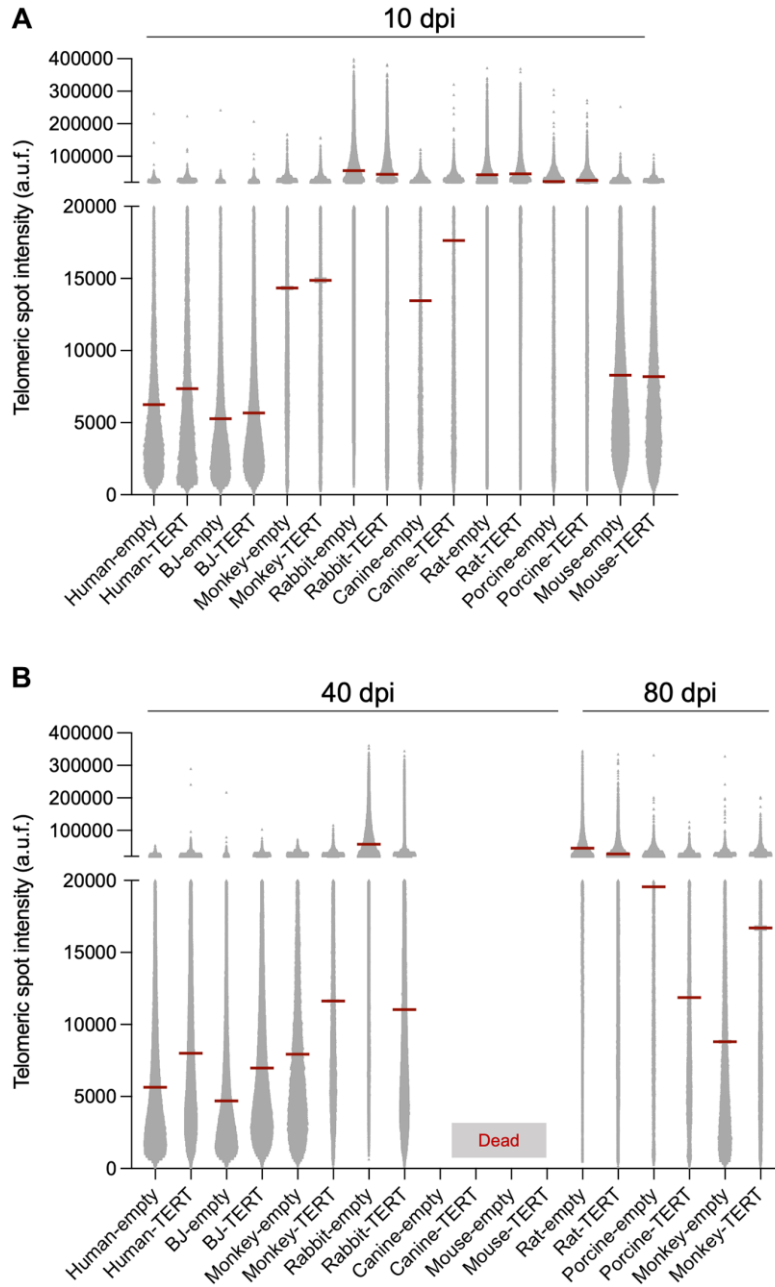

**Supplementary Figure 1. Telomere distribution at different cell passages.** Distribution of single telomere focus intensity in human BJ, human lung fibroblasts, non-human primate lung fibroblasts, porcine lung fibroblasts, canine lung fibroblasts, rabbit lung fibroblasts, rat lung fibroblasts, and in mouse embryonic fibroblasts transduced either with pLOC-empty or pLOC-hTERT. Cells were analyzed at 10 (A), 40, or 80 (B) days post-infection (dpi). The assays were performed in 3-4 replicas, and the individual telomere focus intensity was pooled.
